# Supplementary material for: An improved similarity-based approach to predicting and mapping soil organic carbon and soil total nitrogen in a coastal region of northeastern China
Source: PeerJ. 2020 May 26;8:e9126. doi: 10.7717/peerj.9126 (PMC7258937; doi:10.7717/peerj.9126)
Supplement: Table S1 [file peerj-08-9126-s001.xls]

## Sheet: Sheet1
NO	Lat	Log	SOC (g/kg)	STN (g/kg)	Depth (cm)
1	38.8515	121.143	11.19	0.74	0-20
2	38.8982	121.174	12.45	0.78	0-20
3	38.8922	121.198	10.2	0.74	0-20
4	38.8254	121.295	11.51	0.75	0-20
5	38.7436	121.164	20.95	1.26	0-20
6	38.8116	121.291	15.4	1.08	0-20
7	38.7965	121.193	12.52	0.8	0-20
8	38.8801	121.318	10.39	0.82	0-20
9	38.8508	121.324	15.64	1.1	0-20
10	38.8299	121.201	14.45	1.05	0-20
11	38.8751	121.26	14.57	0.89	0-20
12	38.7455	121.204	11.06	0.78	0-20
13	38.891	121.261	13.45	0.86	0-20
14	38.8977	121.318	15.28	1.15	0-20
15	38.8521	121.318	11.6	0.73	0-20
16	38.8451	121.282	12.89	0.88	0-20
17	38.8959	121.27	11.41	0.7	0-20
18	38.826	121.316	9.94	0.74	0-20
19	38.8806	121.345	14.61	1.03	0-20
20	38.8632	121.26	10.47	0.77	0-20
21	38.9095	121.339	22.02	1.49	0-20
22	38.7701	121.135	13.55	1.02	0-20
23	38.8637	121.422	20.57	1.25	0-20
24	38.8653	121.221	12.9	0.82	0-20
25	38.8623	121.362	14.4	0.96	0-20
26	38.87	121.294	10.33	0.73	0-20
27	38.8304	121.365	12.36	0.8	0-20
28	38.91	121.311	11.12	0.7	0-20
29	38.791	121.152	11.09	0.74	0-20
30	38.7876	121.212	10.54	0.74	0-20
31	38.8341	121.119	11.71	0.76	0-20
32	38.9221	121.274	9.94	0.63	0-20
33	38.8617	121.199	15.03	1.04	0-20
34	38.9058	121.279	10.71	0.63	0-20
35	38.885	121.304	11.1	0.81	0-20
36	38.925	121.337	14.58	1.07	0-20
37	38.8603	121.243	11.32	0.77	0-20
38	38.8029	121.167	9.76	0.6	0-20
39	38.8005	121.296	12.06	0.77	0-20
40	38.8678	121.169	9.77	0.63	0-20
41	38.8553	121.184	12.43	0.83	0-20
42	38.8762	121.36	21.06	1.27	0-20
43	38.9221	121.274	9.94	0.63	0-20
44	38.9355	121.284	11.31	0.67	0-20
45	38.7578	121.145	10.01	0.75	0-20
46	38.8524	121.265	10.48	0.74	0-20
47	38.8727	121.336	14.33	0.9	0-20
48	38.757	121.155	14.43	0.84	0-20
49	38.9406	121.29	9.98	0.72	0-20
50	38.8705	121.285	19.65	1.19	0-20
51	38.8953	121.291	10.28	0.68	0-20
52	38.9299	121.351	20.84	1.27	0-20
53	38.8287	121.377	18.81	1.18	0-20
54	38.914	121.264	8.9	0.57	0-20
55	38.8895	121.375	19.41	1.16	0-20
56	38.8314	121.407	9.35	0.72	0-20
57	38.9197	121.148	10.12	0.73	0-20
58	38.8792	121.247	13.26	0.91	0-20
59	38.8601	121.277	11.53	0.83	0-20
60	38.8503	121.3	13.35	0.83	0-20
61	38.9428	121.32	11.98	0.82	0-20
62	38.8746	121.317	11.03	0.79	0-20
63	38.8936	121.224	10.5	0.69	0-20
64	38.7798	121.153	8.94	0.59	0-20
65	38.8101	121.187	12.63	0.86	0-20
66	38.8786	121.429	13.95	1.03	0-20
67	38.8375	121.313	8.83	0.6	0-20
68	38.772	121.201	13.24	0.89	0-20
69	38.816	121.233	18.17	1.11	0-20
70	38.916	121.221	9.08	0.57	0-20
71	38.8259	121.266	12.62	0.9	0-20
72	38.9411	121.258	12.91	0.84	0-20
73	38.8503	121.34	14.53	1.04	0-20
74	38.8389	121.421	16.2	1.1	0-20
75	38.8698	121.449	20.8	1.27	0-20
76	38.8518	121.404	20.98	1.27	0-20
77	38.8783	121.397	11.96	0.8	0-20
78	38.8405	121.393	9.88	0.69	0-20
79	38.8953	121.291	10.28	0.68	0-20
80	38.8524	121.265	10.48	0.74	0-20
81	38.9266	121.301	11.29	0.7	0-20
82	38.8145	121.219	12.52	0.85	0-20
83	38.812	121.252	13.57	0.9	0-20
84	38.8237	121.159	9.15	0.59	0-20
85	38.9266	121.226	9.28	0.61	0-20
86	38.8524	121.124	10.27	0.73	0-20
87	38.8781	121.217	9.55	0.65	0-20
88	38.9246	121.171	13.88	0.83	0-20
89	38.7777	121.17	9.73	0.63	0-20
90	38.8946	121.376	20.98	1.27	0-20
91	38.8064	121.206	12.19	0.81	0-20
92	38.8465	121.188	17.94	1.11	0-20
93	38.9331	121.145	14.31	0.9	0-20
94	38.9343	121.127	12.51	0.84	0-20
95	38.8471	121.166	9.37	0.59	0-20
96	38.8326	121.336	12.48	0.8	0-20
97	38.8797	121.194	11.66	0.75	0-20
98	38.8438	121.214	12.21	0.77	0-20
99	38.8808	121.185	9.41	0.62	0-20
100	38.9062	121.189	14.32	1	0-20
101	38.8311	121.151	10.3	0.7	0-20
102	38.7592	121.182	19.46	1.19	0-20
103	38.8472	121.236	10.77	0.76	0-20
104	38.9134	121.123	9.62	0.69	0-20
105	38.8363	121.445	13.39	0.86	0-20
106	38.914	121.192	11.9	0.82	0-20
107	38.819	121.305	12.19	0.81	0-20
108	38.8217	121.124	8.81	0.57	0-20
109	38.9171	121.258	8.49	0.58	0-20
110	38.8519	121.155	9.29	0.59	0-20
111	38.8807	121.172	8.81	0.59	0-20
112	38.9016	121.151	8.98	0.59	0-20
113	38.9098	121.129	8.3	0.57	0-20
114	38.7904	121.19	8.89	0.58	0-20
115	38.8292	121.246	9.18	0.59	0-20
116	38.9222	121.236	8.77	0.59	0-20
117	38.8277	121.322	8.68	0.59	0-20
118	38.8449	121.394	9.4	0.64	0-20
119	38.9091	121.36	21.01	1.26	0-20
120	38.9004	121.34	20.43	1.27	0-20
121	38.8269	121.454	20.78	1.26	0-20
122	38.7307	121.153	20.76	1.27	0-20
123	38.7342	121.186	20.74	1.27	0-20
124	38.7524	121.183	20.72	1.27	0-20
125	38.8874	121.161	9.21	0.58	0-20
126	38.9261	121.21	9.21	0.61	0-20
